# Supplementary material for: A pan-cancer perspective of matrix metalloproteases (MMP) gene expression profile and their diagnostic/prognostic potential
Source: Springer Nature journal article supplement (doi:10.1186/s12885-019-5768-0), 2019-06-14
Supplement: MOESM1 [file 16813878]

Supp. Table 1

| Cancer | Protein                 | AUC                     | 90   | 95   | 99   | 100   |                         |                         |                         |      |      |      |      |
|--------|-------------------------|-------------------------|------|------|------|-------|-------------------------|-------------------------|-------------------------|------|------|------|------|
| BLCA   | MMP27                   | 0.96 ( 0.93 - 0.99 )    | 94.7 | 89.5 | 63.2 | 31.6  | KIRC                    | MMP25                   | 0.934 ( 0.924 - 0.944 ) | 85.7 | 80.5 | 54   | 32.5 |
|        | MMP11                   | 0.949 ( 0.936 - 0.962 ) | 92.6 | 91.7 | 73.2 | 73.2  |                         | MMP14                   | 0.922 ( 0.911 - 0.933 ) | 83.5 | 71.1 | 40.7 | 30.4 |
|        | MMP23B                  | 0.881 ( 0.832 - 0.93 )  | 63.2 | 42.1 | 15.8 | 0     |                         | MMP11                   | 0.916 ( 0.904 - 0.928 ) | 79.9 | 64   | 25.5 | 21.6 |
| BRCA   | MMP11                   | 0.994 ( 0.992 - 0.996 ) | 98.7 | 98.2 | 92.3 | 85.3  | KIRP                    | MMP9                    | 0.882 ( 0.867 - 0.897 ) | 63   | 57   | 43.9 | 41.1 |
|        | MMP13                   | 0.954 ( 0.948 - 0.96 )  | 90.3 | 77.6 | 61.9 | 55.7  |                         | MMP16                   | 0.863 ( 0.846 - 0.88 )  | 66.8 | 54   | 51.6 | 49.9 |
|        | MMP1                    | 0.931 ( 0.923 - 0.939 ) | 74.3 | 68.9 | 55.6 | 51.4  |                         | MMP11                   | 0.921 ( 0.905 - 0.937 ) | 76.9 | 70   | 37.6 | 37.6 |
|        | MMP27                   | 0.904 ( 0.886 - 0.922 ) | 73.7 | 64   | 36.8 | 0     |                         | MMP14                   | 0.901 ( 0.882 - 0.92 )  | 77.6 | 68.6 | 59.3 | 59.3 |
| COAD   | MMP28                   | 0.855 ( 0.833 - 0.877 ) | 60.5 | 52.6 | 30.7 | 0     | LIHC                    | MMP11                   | 0.916 ( 0.902 - 0.93 )  | 81.7 | 78.2 | 64.7 | 62   |
|        | MMP11                   | 0.989 ( 0.984 - 0.994 ) | 97.9 | 97.2 | 96.2 | 96.2  | LUAD                    | MMP11                   | 0.977 ( 0.972 - 0.982 ) | 97.5 | 90.1 | 78.6 | 35.9 |
|        | MMP7                    | 0.983 ( 0.977 - 0.989 ) | 97.2 | 94.8 | 87.1 | 87.1  |                         | MMP13                   | 0.912 ( 0.899 - 0.925 ) | 70.3 | 63.5 | 55.2 | 51.3 |
|        | MMP28                   | 0.98 ( 0.965 - 0.995 )  | 100  | 92.7 | 41.5 | 0     |                         | MMP1                    | 0.909 ( 0.896 - 0.922 ) | 75.3 | 62.9 | 55.5 | 52   |
| MMP27  | 0.957 ( 0.936 - 0.978 ) | 90.2                    | 87.8 | 82.9 | 0    | MMP12 |                         | 0.888 ( 0.872 - 0.904 ) | 72.8                    | 57.5 | 42.5 | 38.5 |      |
| ESCA   | MMP13                   | 0.927 ( 0.912 - 0.942 ) | 79.4 | 78.3 | 37.8 | 37.8  | LUSC                    | MMP19                   | 0.878 ( 0.85 - 0.906 )  | 57.6 | 40.7 | 22   | 5.08 |
|        | MMP3                    | 0.907 ( 0.89 - 0.924 )  | 75.9 | 60.8 | 50.4 | 50.4  |                         | MMP17                   | 0.858 ( 0.84 - 0.876 )  | 73.6 | 72.2 | 69.1 | 67.4 |
|        | MMP1                    | 0.899 ( 0.881 - 0.917 ) | 79.4 | 75.5 | 42.3 | 42.3  |                         | MMP11                   | 0.991 ( 0.988 - 0.994 ) | 97.8 | 97.6 | 93.8 | 86.5 |
|        | MMP25                   | 0.865 ( 0.829 - 0.901 ) | 58.5 | 41.5 | 2.44 | 0     |                         | MMP12                   | 0.983 ( 0.978 - 0.988 ) | 95.6 | 95.4 | 86.3 | 80.5 |
|        | MMP12                   | 0.984 ( 0.976 - 0.992 ) | 97.3 | 97.3 | 86.4 | 86.4  |                         | MMP24                   | 0.975 ( 0.96 - 0.99 )   | 94.1 | 90.2 | 35.3 | 1.96 |
|        | MMP11                   | 0.979 ( 0.969 - 0.989 ) | 94   | 94   | 93.5 | 93.5  |                         | MMP1                    | 0.947 ( 0.937 - 0.957 ) | 84.5 | 81.7 | 74.7 | 66.3 |
|        | MMP3                    | 0.938 ( 0.917 - 0.959 ) | 92.4 | 92.4 | 73.4 | 73.4  |                         | MMP28                   | 0.944 ( 0.922 - 0.966 ) | 92.2 | 52.9 | 0    | 0    |
|        | MMP9                    | 0.926 ( 0.902 - 0.95 )  | 87   | 87   | 71.2 | 71.2  |                         | MMP19                   | 0.931 ( 0.907 - 0.955 ) | 76.5 | 56.9 | 31.4 | 0    |
| MMP1   | 0.92 ( 0.895 - 0.945 )  | 88                      | 88   | 51.1 | 51.1 | MMP3  | 0.924 ( 0.912 - 0.936 ) | 81.3                    | 76.9                    | 71.9 | 70.7 |      |      |
| HNSC   | MMP13                   | 0.916 ( 0.89 - 0.942 )  | 84.2 | 84.2 | 48.4 | 48.4  | MMP23B                  | 0.905 ( 0.878 - 0.932 ) | 72.6                    | 41.2 | 7.84 | 0    |      |
|        | MMP10                   | 0.898 ( 0.867 - 0.929 ) | 90.2 | 90.2 | 35.9 | 35.9  | MMP10                   | 0.896 ( 0.88 - 0.912 )  | 78.5                    | 71.9 | 65.9 | 60.6 |      |
|        | MMP14                   | 0.898 ( 0.867 - 0.929 ) | 83.2 | 83.2 | 39.7 | 39.7  | MMP14                   | 0.894 ( 0.878 - 0.91 )  | 79.5                    | 71.7 | 55   | 19.5 |      |
|        | MMP11                   | 0.964 ( 0.957 - 0.971 ) | 84.2 | 83.7 | 69.4 | 69.4  | MMP13                   | 0.886 ( 0.869 - 0.903 ) | 77.7                    | 74.7 | 58.2 | 52   |      |
| KICH   | MMP9                    | 0.941 ( 0.93 - 0.952 )  | 80.2 | 68.1 | 58.3 | 58.3  | PRAD                    | MMP26                   | 0.863 ( 0.844 - 0.882 ) | 68   | 52.1 | 33.4 | 25.8 |
|        | MMP12                   | 0.933 ( 0.921 - 0.945 ) | 76.9 | 60.6 | 49.8 | 49.8  | STAD                    | MMP11                   | 0.964 ( 0.956 - 0.972 ) | 92.8 | 87.2 | 81.7 | 81.7 |
|        | MMP14                   | 0.918 ( 0.904 - 0.932 ) | 78.5 | 76.2 | 11.7 | 11.7  | THCA                    | MMP11                   | 0.928 ( 0.917 - 0.939 ) | 81.6 | 72.5 | 62.4 | 25.2 |
|        | MMP1                    | 0.913 ( 0.899 - 0.927 ) | 74   | 63.3 | 5    | 5     | UCEC                    | MMP28                   | 0.933 ( 0.899 - 0.967 ) | 79.2 | 62.5 | 54.2 | 25   |
|        | MMP13                   | 0.913 ( 0.899 - 0.927 ) | 78.3 | 50.8 | 44.4 | 44.4  |                         | MMP15                   | 0.912 ( 0.891 - 0.933 ) | 81.8 | 77.3 | 68.8 | 68.8 |
| MMP28  | 0.962 ( 0.936 - 0.988 ) | 96                      | 68   | 56   | 8    | MMP12 |                         | 0.904 ( 0.881 - 0.927 ) | 71                      | 59.1 | 59.1 | 59.1 |      |
| KIPAN  | MMP23B                  | 0.94 ( 0.907 - 0.973 )  | 72   | 64   | 24   | 20    | MMP1                    | 0.876 ( 0.849 - 0.903 ) | 59.7                    | 18.8 | 1.14 | 1.14 |      |
|        | MMP24                   | 0.887 ( 0.854 - 0.92 )  | 75.8 | 75.8 | 74.2 | 74.2  | MMP9                    | 0.872 ( 0.844 - 0.9 )   | 68.8                    | 58   | 51.7 | 51.7 |      |
|        | MMP7                    | 0.884 ( 0.84 - 0.928 )  | 56   | 48   | 16   | 4     |                         |                         |                         |      |      |      |      |
|        | MMP15                   | 0.875 ( 0.841 - 0.909 ) | 80.3 | 68.2 | 62.1 | 62.1  |                         |                         |                         |      |      |      |      |

Supp. Fig 1

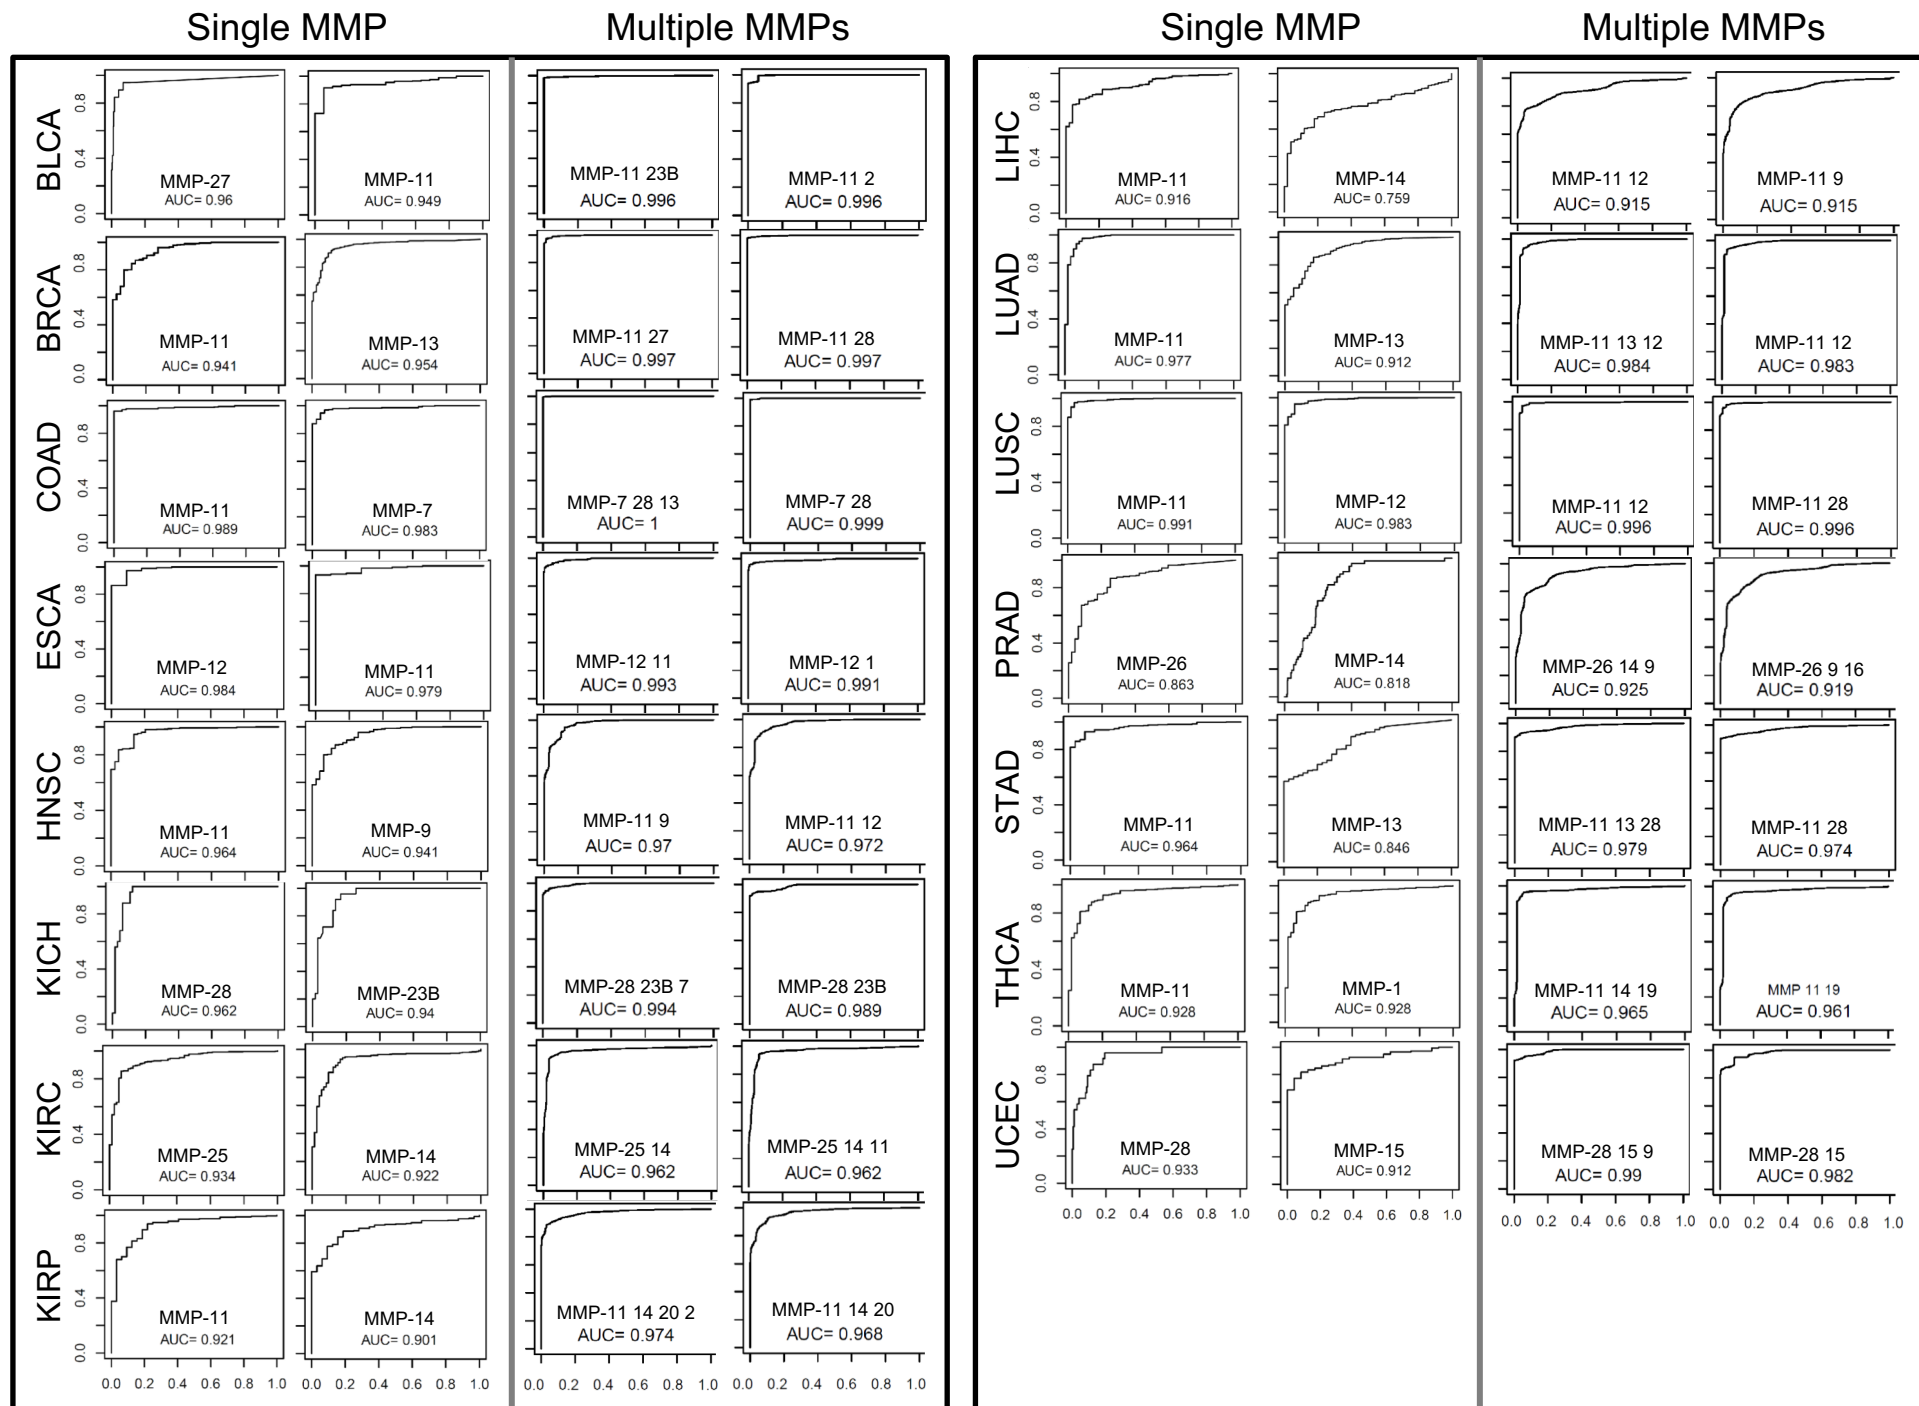

Supplementary Table 2: Significant survival differences associated with altered MMP expression

| Cancer | Gene   | Cutoff Percentile | HR   | 1/HR | p-val   |
|--------|--------|-------------------|------|------|---------|
| KICH   | MMP15  | 60                | <0.1 | >20  | 1.6E-03 |
| KIRP   | MMP15  | 90                | <0.1 | >20  | 9.8E-04 |
| KIRP   | MMP19  | 90                | <0.1 | >20  | 3.3E-03 |
| KIRP   | MMP24  | 90                | <0.1 | >20  | 6.1E-03 |
| KICH   | MMP24  | 10                | <0.1 | 10.6 | 2.0E-03 |
| KICH   | MMP17  | 40                | 6.0  | 0.2  | 5.3E-03 |
| THCA   | MMP23B | 90                | 4.4  | 0.2  | 7.7E-03 |
| ESCA   | MMP7   | 90                | 0.3  | 4.0  | 2.9E-03 |
| UCEC   | MMP9   | 10                | 0.3  | 3.5  | 7.3E-03 |
| THCA   | MMP17  | 70                | 3.3  | 0.3  | 8.4E-03 |
| KIRP   | MMP23B | 90                | 3.0  | 0.3  | 9.1E-03 |
| KIRC   | MMP19  | 20                | 2.7  | 0.4  | 4.4E-06 |
| KIRP   | MMP20  | 10                | 0.4  | 2.7  | 6.7E-04 |
| KIRP   | MMP7   | 80                | 2.6  | 0.4  | 5.3E-03 |
| LUAD   | MMP24  | 10                | 0.4  | 2.4  | 5.5E-05 |
| COAD   | MMP19  | 30                | 2.4  | 0.4  | 2.4E-03 |
| KIRC   | MMP14  | 90                | 2.2  | 0.5  | 4.8E-04 |
| KIRC   | MMP9   | 40                | 1.5  | 0.7  | 8.1E-03 |
| KIRC   | MMP24  | 10                | 0.5  | 2.0  | 2.2E-03 |
| ESCA   | MMP12  | 40                | 2.0  | 0.5  | 3.9E-03 |
| COAD   | MMP23B | 70                | 1.9  | 0.5  | 8.5E-03 |
| BRCA   | MMP13  | 90                | 1.9  | 0.5  | 4.2E-03 |
| BLCA   | MMP14  | 20                | 1.9  | 0.5  | 2.7E-03 |
| HNSC   | MMP13  | 20                | 1.9  | 0.5  | 1.2E-03 |
| STAD   | MMP23B | 40                | 1.8  | 0.5  | 3.7E-04 |
| KIRC   | MMP17  | 20                | 1.8  | 0.6  | 1.1E-03 |
| LIHC   | MMP20  | 20                | 0.6  | 1.8  | 1.5E-03 |
| HNSC   | MMP25  | 10                | 0.6  | 1.7  | 9.5E-03 |
| LIHC   | MMP9   | 40                | 1.7  | 0.6  | 5.2E-03 |
| BLCA   | MMP15  | 40                | 0.6  | 1.7  | 8.0E-04 |
| KIRC   | MMP3   | 60                | 0.7  | 1.4  | 2.8E-04 |
| BLCA   | MMP28  | 70                | 0.6  | 1.6  | 5.0E-03 |
| KIRC   | MMP7   | 40                | 1.6  | 0.6  | 2.9E-03 |
| LIHC   | MMP13  | 70                | 0.8  | 1.3  | 8.4E-03 |
| LUSC   | MMP28  | 60                | 1.6  | 0.6  | 1.6E-03 |
| LUSC   | MMP25  | 70                | 1.5  | 0.6  | 3.9E-03 |
| STAD   | MMP12  | 60                | 0.6  | 1.5  | 8.2E-03 |
